# Supplementary material for: A switchable NO-releasing nanomedicine for enhanced cancer therapy and inhibition of metastasis
Source: Royal Society of Chemistry journal article supplement (doi:10.1039/c9nr00732f), 2019-01-01
Supplement: c9nr00732f2.pdf [file c9nr00732f2.pdf]

## Supporting Information

### SUPPLEMENTARY FIGURES

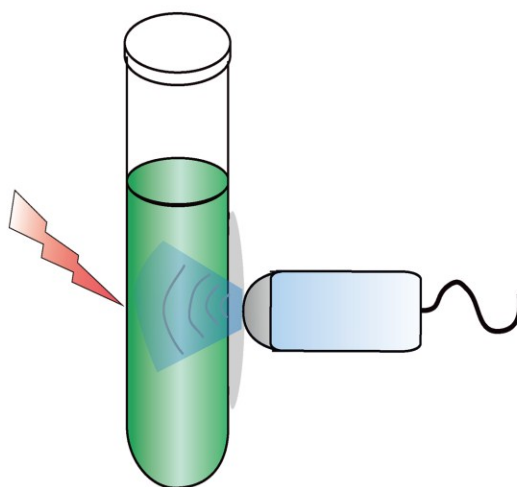

**Figure S1.** Schematic of in vitro ultrasound imaging experiment.

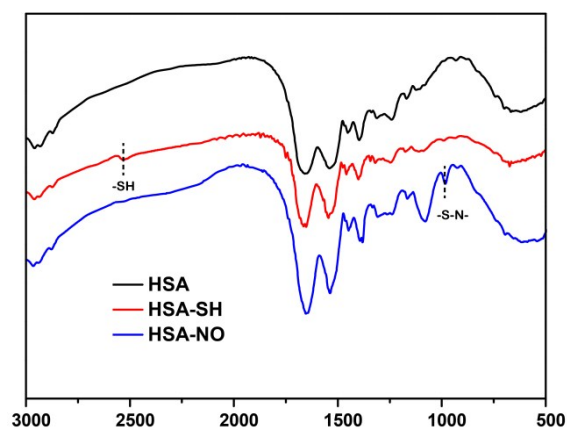

**Figure S2.** FT-IR spectra of HSA, HSA-SH and HSA-NO (-SH: 2550  $\text{cm}^{-1}$ , -S-N-: 955  $\text{cm}^{-1}$ ).

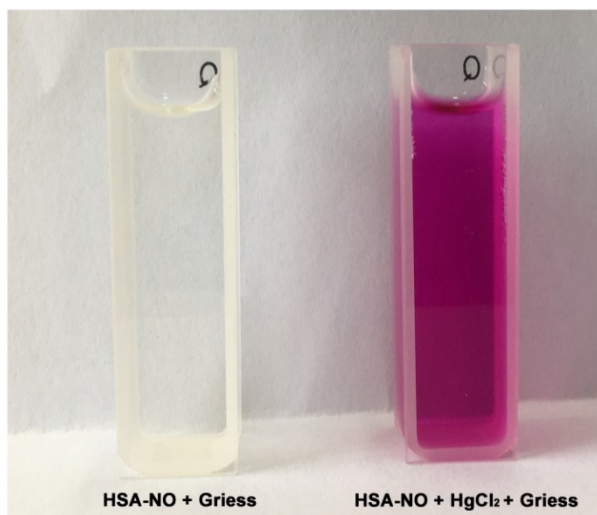

**Figure S3.** The change from faint yellow liquid to pink liquid in the reaction process as Griess assay quickly became pink once the SNO was reduced to  $\text{NO}_2^-$  by  $\text{HgCl}_2$ .

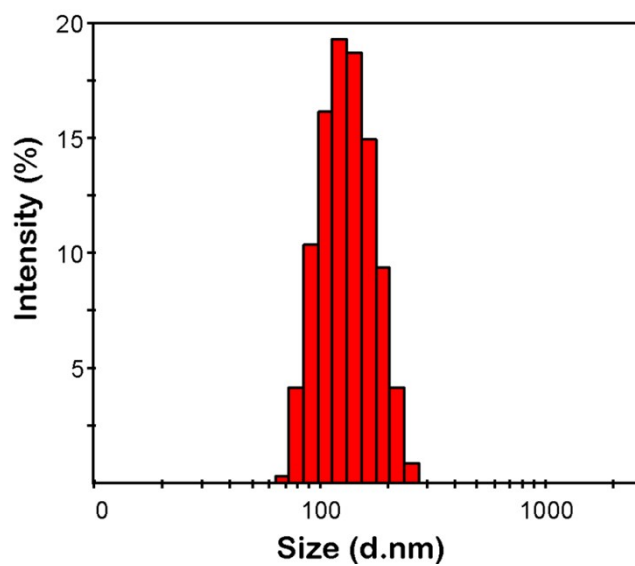

**Figure S4.** Size distribution of IPH.

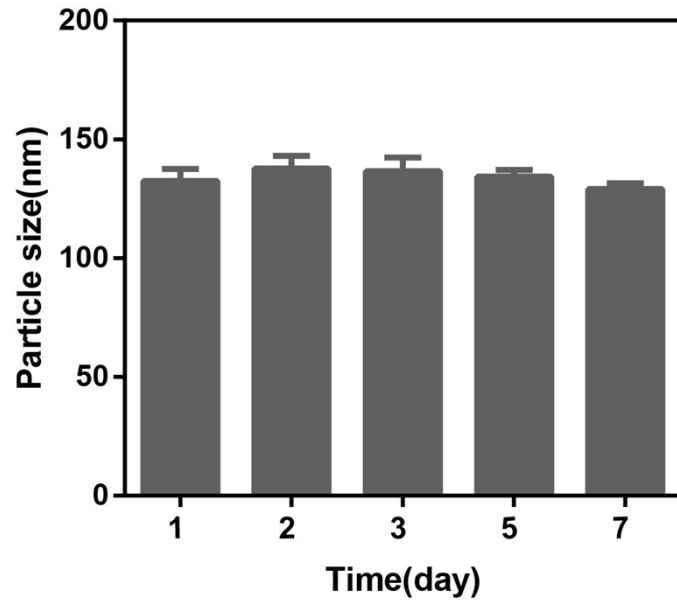

Figure S5. The storage stability of IPH-NO in PBS at  $-4\text{ }^{\circ}\text{C}$ .

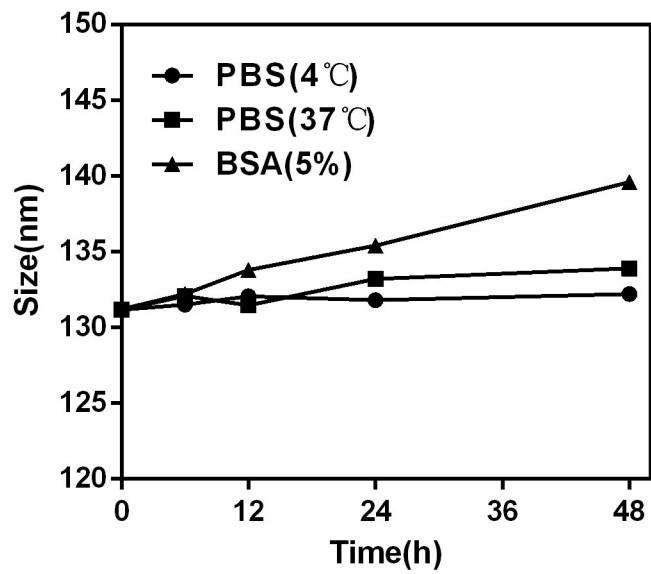

Figure S6. The stability of IPH-NO in PBS at  $-4\text{ }^{\circ}\text{C}$  or  $37\text{ }^{\circ}\text{C}$  or in 5%.FBS.

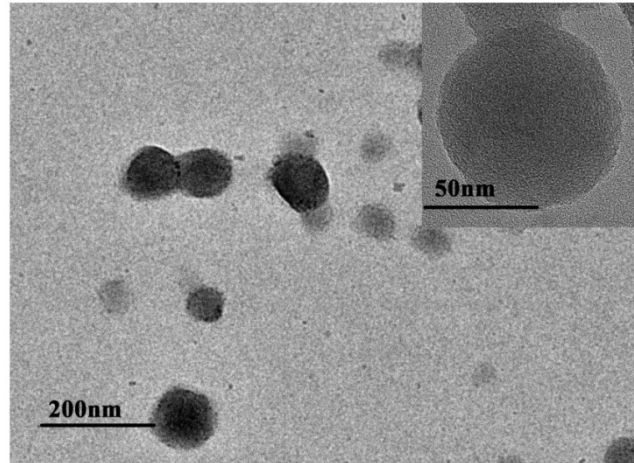

**Figure S7.** TEM images of IPH-NO. The scale bar is 200 nm. Inset: TEM images of a single NP, the scale bar is 50 nm.

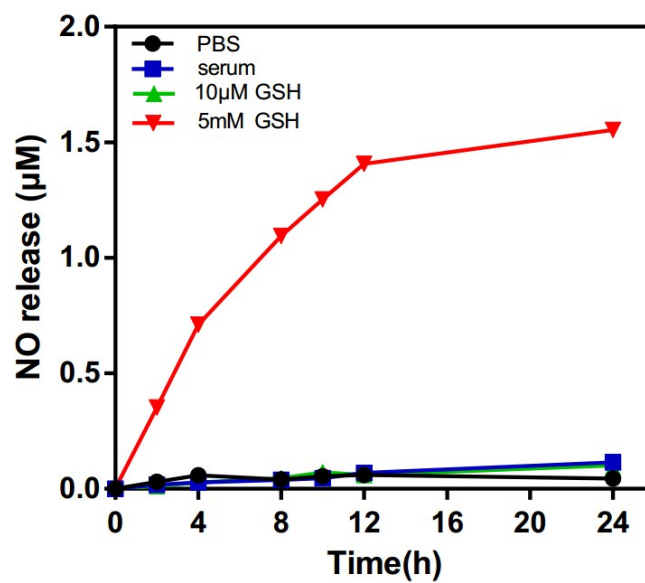

**Figure S8.** In vitro NO release of IPH-NO NPs in serum and GSH (0, 10 μM, 5 mM) in PBS at 37°C.

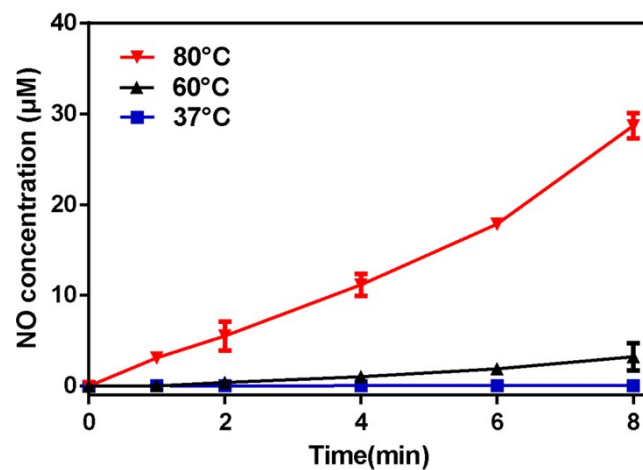

**Figure S9.** The influence of direct heating on NO release from IPH-NO.

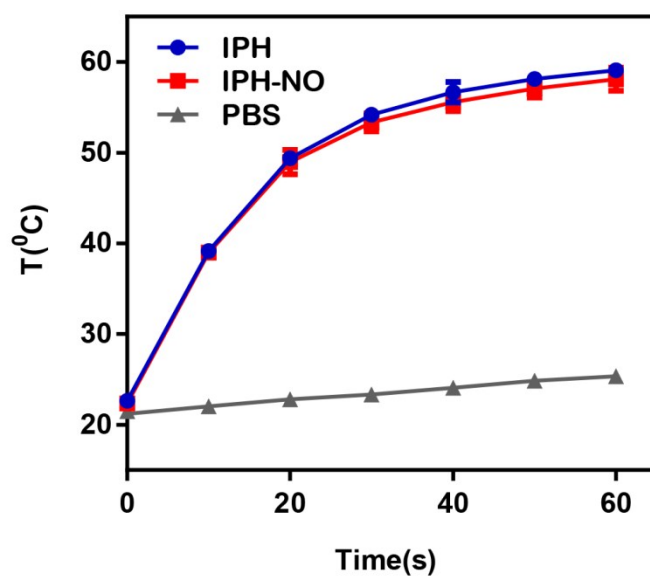

**Figure S10.** The temperature elevation curve of PBS, IPH-NO and IPH after continuous time with NIR irradiation.

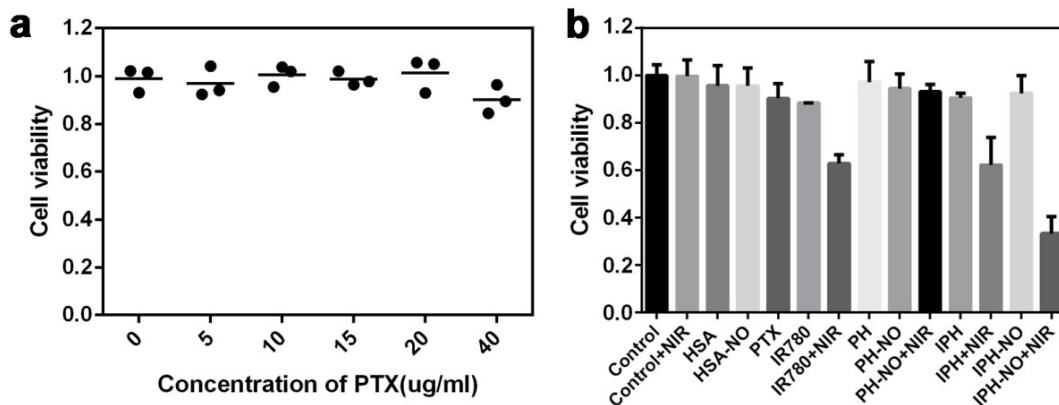

**Figure S11. Cell cytotoxicity.** (a) The cell viability of PTX at different concentrations. 1 mg of PTX was dissolved in 1 ml of DMSO as a stock solution. The stock solution was diluted to different concentrations with medium. PTX-free DMSO medium dilutions were used as a control. (b) The cell viability of all samples (NO 4  $\mu$ M, IR780 2  $\mu$ g/ml, and PTX 20  $\mu$ g/ml).

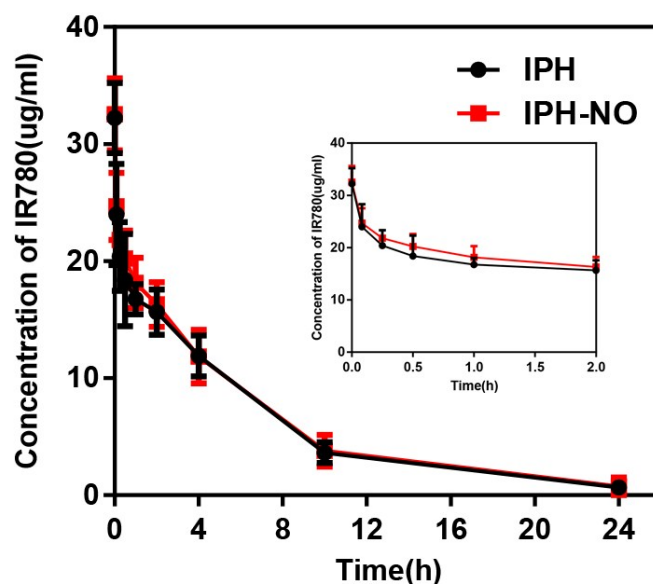

**Figure S12.** Blood retentions of IPH-NO and IPH over a span of 24 h.

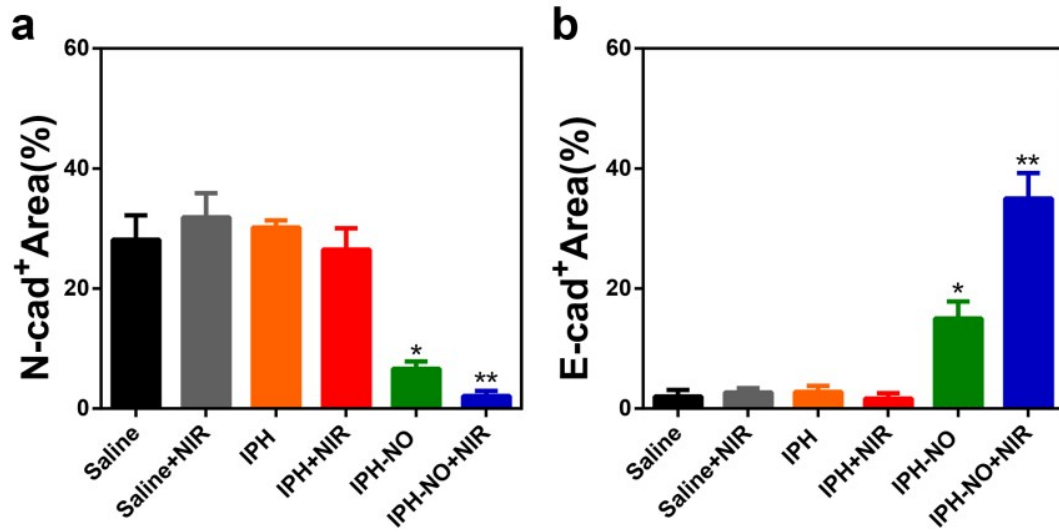

**Figure S13.** Quantification of relative N-cadherin (a) and E-cadherin (b) fluorescence intensity. Data are demonstrated as mean  $\pm$  SD. Significant differences were analyzed by compared with the saline group (\* $p < 0.05$ , \*\* $p < 0.01$ ).

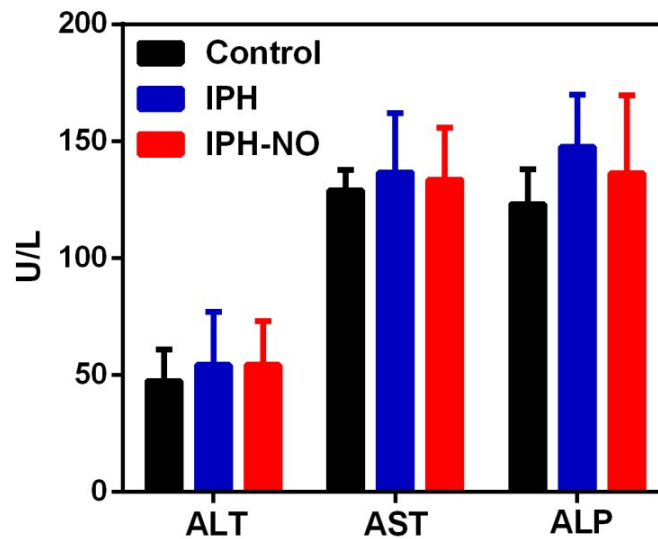

**Figure S14.** Liver toxicity assessments. Seven days after the injection of the nanoparticles, ALT, AST and ALP activities in the serum of the mice were measured.

**Table S1**

CBCs of the mice treated with saline, IPH and IPH-NO. Healthy ICR mice were randomly divided into 3 groups (n = 3). Saline, IPH and IPH-NO were administered via the tail vein at the dose of 20 mg PTX/kg, 2mg/kg IR780 and 4mmol/kg NO respectively. Blood samples were collected and analyzed seven days after injection.

|                                 | <b>Saline</b>  | <b>IPH</b>     | <b>IPH-NO</b> | <b>Reference range</b> |
|---------------------------------|----------------|----------------|---------------|------------------------|
| <b>WBC (10<sup>9</sup>/L)</b>   | 3.97±1         | 4.6±2.12       | 2.5±0.87      | 0.8-6.8                |
| <b>Lymph (10<sup>9</sup>/L)</b> | 2.23±0.71      | 1.9±1.21       | 0.97±0.25     | 0.7-5.7                |
| <b>Mon (10<sup>9</sup>/L)</b>   | 0.27±0.06      | 0.24±0.1       | 0.17±0.12     | 0.0-0.3                |
| <b>Gran (10<sup>9</sup>/L)</b>  | 1.47±0.25      | 2.3±1.08       | 1.37±0.57     | 0.1-1.8                |
| <b>Lymph (%)</b>                | 64.43±4.14     | 70.8±10.06     | 70.27±9.68    | 55.8-90.6              |
| <b>Mon (%)</b>                  | 5.4±0.78       | 4.43±1.56      | 4.7±1.57      | 1.8-6.0                |
| <b>Gran (%)</b>                 | 36.17±3.9      | 29.77±8.93     | 33.03±8.16    | 8.6-38.9               |
| <b>RBC (10<sup>12</sup>/L)</b>  | 7.22±1.09      | 6.8±1.1        | 7.25±1.14     | 6.36-9.42              |
| <b>HGB (g/l)</b>                | 129.33±16.65   | 117.67±20.5    | 125.33±19.14  | 110-143                |
| <b>HCT (%)</b>                  | 37.27±5.96     | 34.5±7.91      | 37.7±6.29     | 34.6-44.6              |
| <b>MCV (fl)</b>                 | 51.57±0.51     | 50.47±2.05     | 52±0.56       | 48.2-58.3              |
| <b>MCH (pg)</b>                 | 17.9±0.72      | 17.23±0.29     | 17.23±0.25    | 15.8-19                |
| <b>MCHC (g/l)</b>               | 348.33±17.21   | 324±13.39      | 332.33±6.35   | 302-353                |
| <b>RDW (%)</b>                  | 12.8±0.35      | 14.77±2.93     | 12.9±0.53     | 13-17                  |
| <b>PLT (10<sup>9</sup>/L)</b>   | 1499.67±143.09 | 1241.33±226.42 | 1328±144.21   | 450-1590               |
| <b>MPV (fl)</b>                 | 5.3±0.2        | 5.8±0.3        | 5.2±0.1       | 3.8-6.0                |

**SUPPLEMENTARY VIDEOS**

**Supplementary Video 1.** Video of ultrasound imaging for IPH-NO



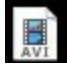

IPH-NO.avi
